# Supplementary material for: Suppression of RNA-dependent RNA polymerase 6 in tomatoes allows potato spindle tuber viroid to invade basal part but not apical part including pluripotent stem cells of shoot apical meristem
Source: PubMed Central journal article supplement (PMC7384629; doi:10.1371/journal.pone.0236481), 2020-07-27
Supplement: pone.0236481.s001.pdf [file pone.0236481.s001.pdf]

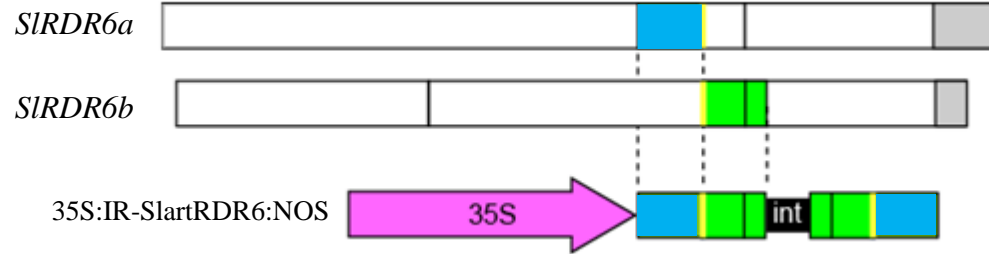

SlartRDR6 (621 bp)

```

TGAGAGGGATGTTGGCTAGCATTAGAGCTGCTCAGCTTGGCGACCTCAGGAATAAGACAAGGATGTTGTTACTTCAGGAAGGTGGTTGATGGGCTGTTT
TGAGAGGGATGTTGGCTAGCATTAGAGCTGCTCAGCTTGGCGACCTCAGGAATAAGACAAGGATGTTGTTACTTCAGGAAGGTGGTTGATGGGCTGTTT
TGAGAGGGATGTTGGCTAGCATTAGAGCTGCTCAGCTTGGCGACCTCAGGAATAAGACAAGGATGTTGTTACTTCAGGAAGGTGGTTGATGGGCTGTTT

GGATGAATTAGGTGAACCTTGAGCAAGGCCAATGCTTTATTCAAGTGTCAAGCCCTTCTTTGGAGACCTGTTTGTTAAGCATGGTCCAGAGTCTTTCTGAA
GGATGAATTAGGTGAACCTTGAGCAAGGCCAATGCTTTATTCAAGTGTCAAGCCCTTCTTTGGAGACCTGTTTGTTAAGCATGGTCCAGAGTCTTTCTGAA
GGATGAATTAGGTGAACCTTGAGCAAGGCCAATGCTTTATTCAAGTGTCAAGCCCTTCTTTGGAGACCTGTTTGTTAAGCATGGTCCAGAGTCTTTCTGAA

ATCAAGAAAAATCTTCAAGTAGTAAAGGGCCTTGTTGTAATTGCAAAGAACCCTGTCTTCATCCCGGGGATGTGAGGATTCTGGAGGCTGTAGATGTTT
ATCAAGAAAAATCTTCAAGTAGTAAAGGGCCTTGTTGTAATTGCAAAGAACCCTGTCTTCATCCCGGGGATGTGAGGATTCTGGAGGCTGTAGATGTTT
ATCAAGAAAAATCTTCAAGTAGTAAAGGGCCTTGTTGTAATTGCAAAGAACCCTGTCTTCATCCCGGGGATGTGAGGATTCTGGAGGCTGTAGATGTTT

CTGGTTTACACCATCTCTATGATTGCTGGTCTTTCCTCAGAAAGGGGATAGGCCACATCCAGATCAAGCATCAGGGAGTGACCTTGACGGTGACCTCTA
CTGGTTTACACCATCTCTATGATTGCTGGTCTTTCCTCAGAAAGGGGATAGGCCACATCCAGATCAAGCATCAGGGAGTGACCTTGACGGTGACCTCTA
CTGGTTTACACCATCTCTATGATTGCTGGTCTTTCCTCAGAAAGGGGATAGGCCACATCCAGATCAAGCATCAGGGAGTGACCTTGACGGTGACCTCTA

CTTTGTGGCTTGGGATAAAAAATCTCATCCACCCAGTAAGAAAAGCTGGATGCCAATGGACTATGCTCCTGCAGAAGCTAAACAGTTGGGTCGTCAAATT
CTTTGTGACTTGGGATAAAAAATCTCATCCACCCAGTAAGAAAAGCTGGATGCCAATGGACTATGCTCCTGCAGAAGCTAAACAGTTGGGTCGTCAAATT
CTTTGTGACTTGGGATAAAAAATCTCATCCACCCAGTAAGAAAAGCTGGATGCCAATGGACTATGCTCCTGCAGAAGCTAAACAGTTGGGTCGTCAAATT

GAACATCGGGACATTATACATTTTTCTCAAAGAACATGGTTCAAGAGAGCTTAGGAGAAATCTGCAACCGCATGTGGTTTCATGCTGACCTCAGTGAAC
CAACATCGGGACATAATAATTTTTCTCAAAGAACATGGTTCAAGAGAGCTTAGGAGAAATCTGCAACCGCATGTGGTTTCATGCTGACCTCAGTGAAC
GAACATCGGGACATTATACATTTTTCTCAAAGAACATGGTTCAAGAGAGCTTAGGAGAAATCTGCAACCGCATGTGGTTTCATGCTGACCTCAGTGAAC

TTGGAGCTTTGGATGAGAAGT
TTGGAGCTATGGATGAGAAGT
TTGGAGCTTTGGATGAGAAGT

```

**S1 Fig. Diagram of the SlartRDR6 transgene introduced into line 91B.** The chimeric sequence of SlartRDR6 was designed from parts of *SlRDR6a* and *SlRDR6b* mRNA sequences and was used for inverted repeat (IR) construction containing an intron sequence. The IR-SlartRDR6 construct was inserted downstream of the CaMV-35S promoter and upstream of the NOS terminator.
