# Supplementary material for: Suppression of RNA-dependent RNA polymerase 6 in tomatoes allows potato spindle tuber viroid to invade basal part but not apical part including pluripotent stem cells of shoot apical meristem
Source: PubMed Central journal article supplement (PMC7384629; doi:10.1371/journal.pone.0236481), 2020-07-27
Supplement: pone.0236481.s002.pdf [file pone.0236481.s002.pdf]

CaMV-35S promoter sequence (835 bp)

```
AGATTAGCCTTTTCAATTTTCAGAAAGAATGCTAACCCACAGATGGTTAGAGAGGCTTACGCAG
CAGGTCTCATCAAGACGATCTACCCGAGCAATAATCTCCAGGAAATCAAATACCTTCCCAAGA
AGGTTAAAGATGCAGTCAAAGATTTCAGGACTAACTGCATCAAGAACACAGAGAAAGATATA
TTTCTCAAGATCAGAAGTACTATTCCAGTATGGACGATTCAAGGCTTGCTTCACAAACCAAGG
CAAGTAATAGAGATTGGAGTCTCTAAAAAGGTAGTTCCTCACTGAATCAAAGGCCATGGAGTC
AAAGATTCAAATAGAGGACCTAACAGAACTCGCCGTAAAGACTGGCGAACAGTTCATACAGA
GTCTCTTACGACTCAATGACAAGAAGAAAATCTTCGTCAACATGGTGGAGCACGACACACTT
GTCTACTCCAAAAATATCAAAGATACAGTCTCAGAAGACCAAAGGGCAATTGAGACTTTTCA
ACAAAGGGTAATATCCGGAAACCTCCTCGGATTCCATTGCCAGCTATCTGTCACTTTATTGTG
AAGATAGTGGAAAAGGAAGGTGGCTCCTACAAATGCCATCATTGCGATAAAGGAAAGGCCAT
CGTTGAAGATGCCTCTGCCGACAGTGGTCCCAAAGATGGACCCCAACCCACGAGGAGCATCG
TGGAAAAAGAAGACGTTCCAACCACGTCTTCAAAGCAAGTGGATTGATGTGATATCTCCACT
GACGTAAGGGATGACGCACAATCCCCTATCCTTCGCAAGACCCTTCCTCTATATAAGGAAGT
TCATTTCAATTTGGAGAGAACACG
```

Target region of DIG-labeled cRNA probe for 35S promoter is indicate with yellow background.

**S2 Fig. Target region of DIG-labeled cRNA probe for CaMV-35S promoter.**
