# Supplementary material for: Suppression of RNA-dependent RNA polymerase 6 in tomatoes allows potato spindle tuber viroid to invade basal part but not apical part including pluripotent stem cells of shoot apical meristem
Source: PubMed Central journal article supplement (PMC7384629; doi:10.1371/journal.pone.0236481), 2020-07-27
Supplement: pone.0236481.s003.pdf [file pone.0236481.s003.pdf]

PSTVd (-Int or -RG1) was inoculated on 15 tomato seedlings (EC or SIRDR6i)  
PSTVd-inoculated plants were divided into 3 groups each consisting of 5 individual plants

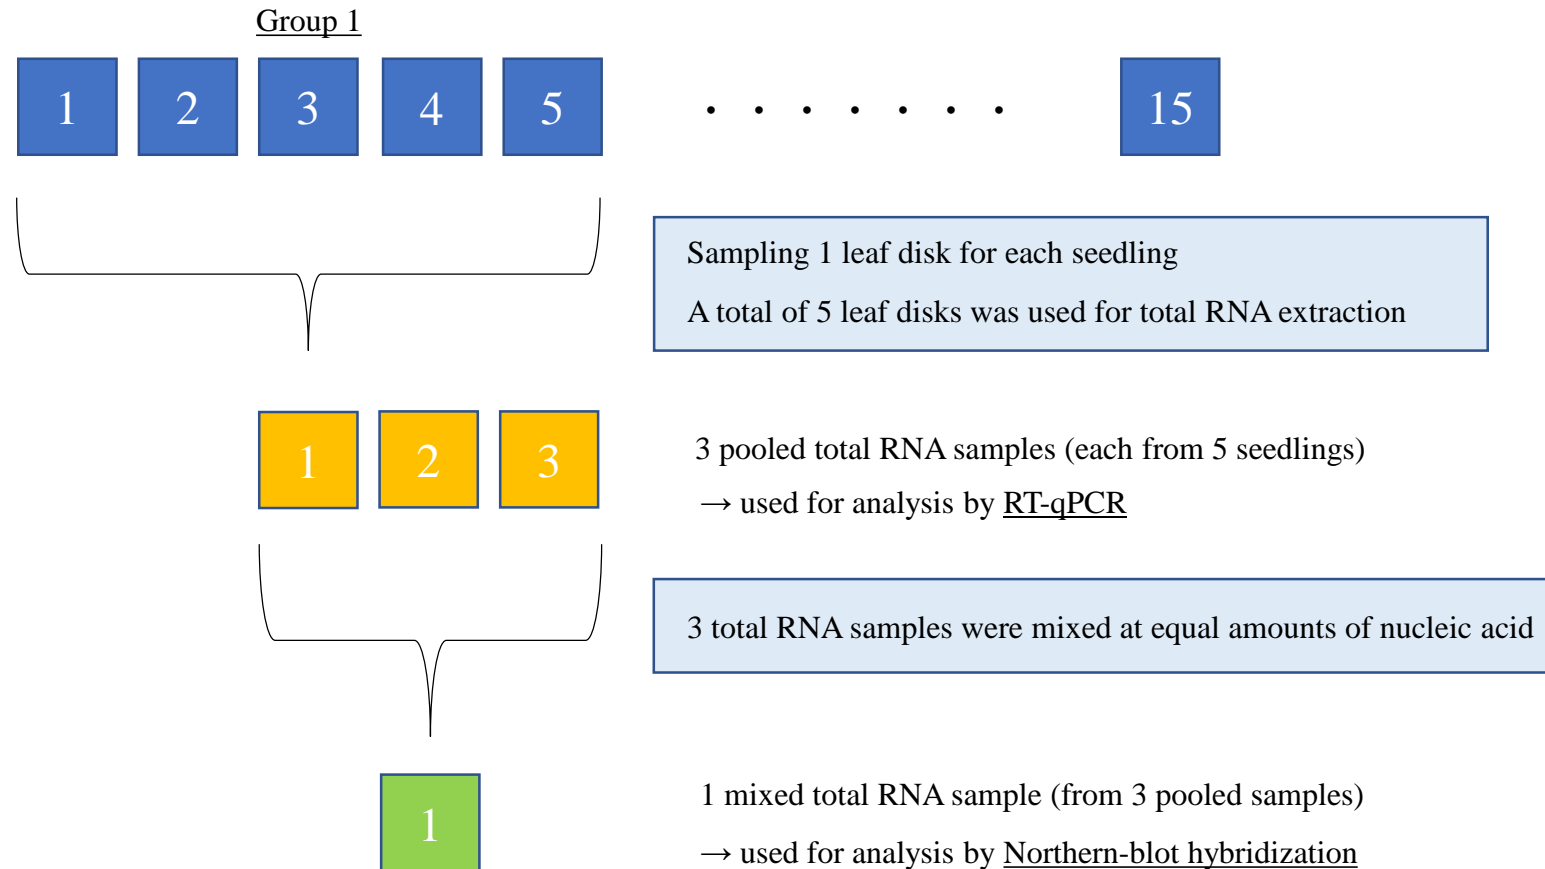

**S3 Fig. How to adjust total RNA samples used for RT-qPCR and Northern-blot hybridization.**
