# Supplementary material for: Suppression of RNA-dependent RNA polymerase 6 in tomatoes allows potato spindle tuber viroid to invade basal part but not apical part including pluripotent stem cells of shoot apical meristem
Source: PubMed Central journal article supplement (PMC7384629; doi:10.1371/journal.pone.0236481), 2020-07-27
Supplement: pone.0236481.s006.pdf [file pone.0236481.s006.pdf]

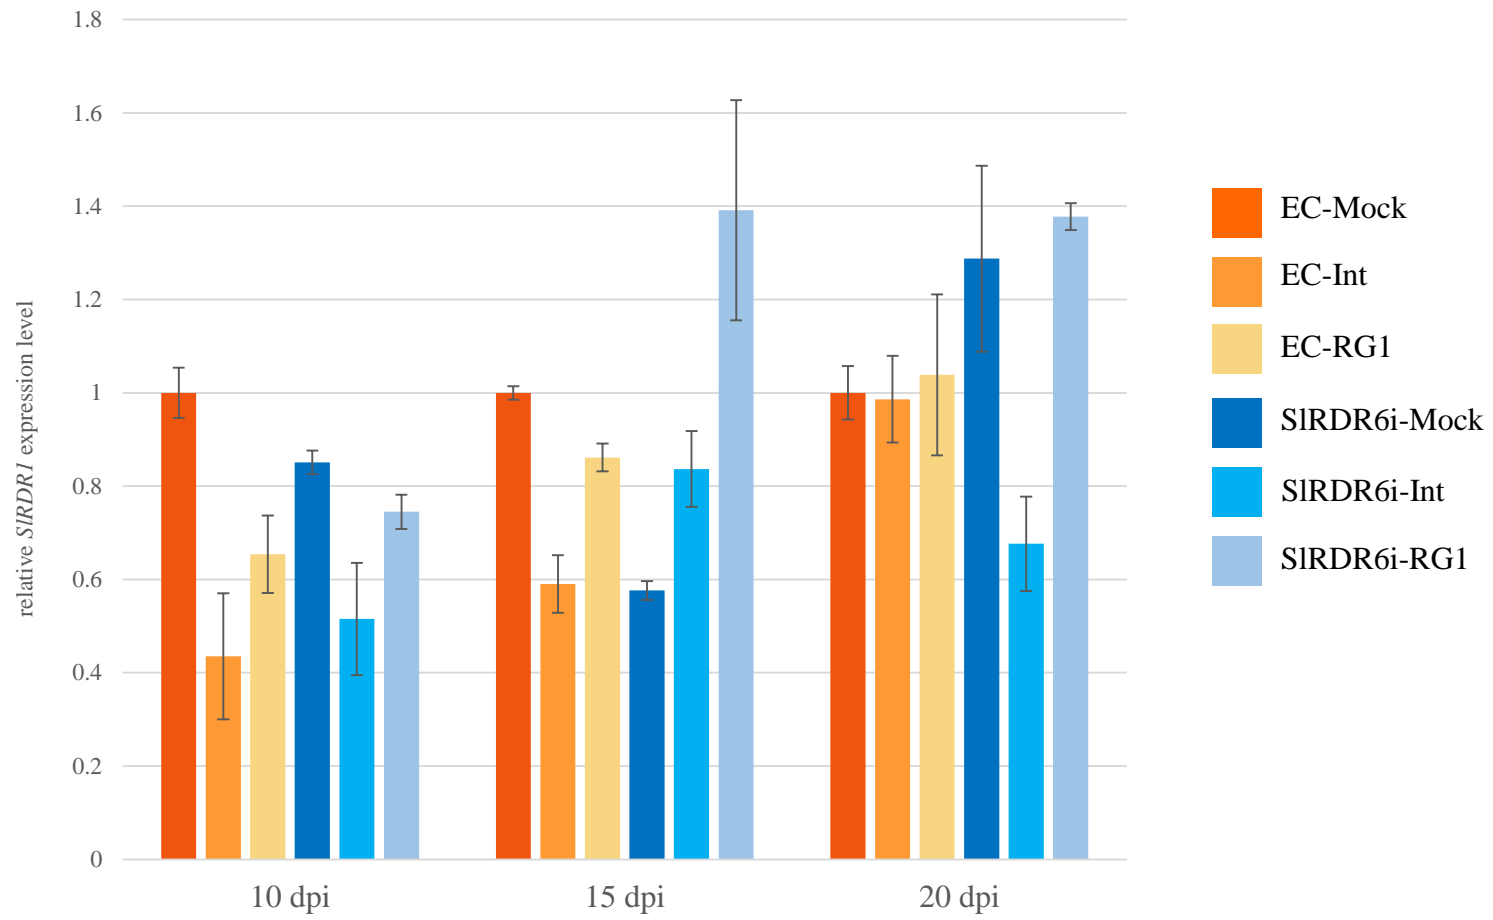

**S6 Fig. Time-course analysis of *SIRDR1* expression levels.** The expression levels of endogenous *SIRDR1* mRNA were analyzed by RT-qPCR. qPCR analysis was performed with the PCR primers for endogenous *SIRDR1* mRNA. Mean values are based on three biological replicates of the pooled sample of five individual plants. The relative expression levels were calculated for each time point with the value of EC plants inoculated with mock as a standard. The expression levels of endogenous *SIRDR1* mRNA were apparently different between Int- or RG1-infected *SIRDR6i* plants at later infection stage, or between RG1-infected EC and *SIRDR6i* plants at 15 dpi.
