# Supplementary material for: Suppression of RNA-dependent RNA polymerase 6 in tomatoes allows potato spindle tuber viroid to invade basal part but not apical part including pluripotent stem cells of shoot apical meristem
Source: PubMed Central journal article supplement (PMC7384629; doi:10.1371/journal.pone.0236481), 2020-07-27
Supplement: pone.0236481.s008.pdf [file pone.0236481.s008.pdf]

**S1 Table. The list of primers used in PCR and RT-qPCR.**

| Target         | Primer name      | Primer sequence 5'-3'    | Reference    |
|----------------|------------------|--------------------------|--------------|
| SIRDR1         | RDR1-For         | ATGCTGAGGCCATTAGTGTGCTG  | [41]         |
|                | RDR1-Rev         | CCAAGCCGAAGCCTTGGTAACAT  |              |
| SIRDR6         | RDR6-For         | GCGGCTATAATGTTGAGTGCAGGG | [41]         |
|                | RDR6-Rev         | GTCTTATTCCTGAGGTCGCCAAGC |              |
| PSTVd          | PSTVd-231F       | GCCCCCTTGGCGCTGT         | [14]         |
|                | PSTVd-296R       | AAGCGTTCTCGGGAGCTT       |              |
| $\beta$ -actin | $\beta$ -actin F | GAGGACAGGATGCTCCTCAG     | [This study] |
|                | $\beta$ -actin R | AGACGCCTATGTGGGAGATG     |              |
| 35S promoter   | 35S-For          | AGGAAACAGCTATGACCATG     | [37]         |
|                | 35S-Rev          | GAACTTCCTATATAGAGGAAGG   |              |
| actin          | actin-For        | GCCATGCCCTTTTAAATGGC     | [37]         |
|                | actin-Rev        | CAGTTGGAGGGGACTGAATC     |              |
