# Supplementary material for: Suppression of RNA-dependent RNA polymerase 6 in tomatoes allows potato spindle tuber viroid to invade basal part but not apical part including pluripotent stem cells of shoot apical meristem
Source: PubMed Central journal article supplement (PMC7384629; doi:10.1371/journal.pone.0236481), 2020-07-27
Supplement: pone.0236481.s009.pdf [file pone.0236481.s009.pdf]

**Fig. 1A gel and blot images**

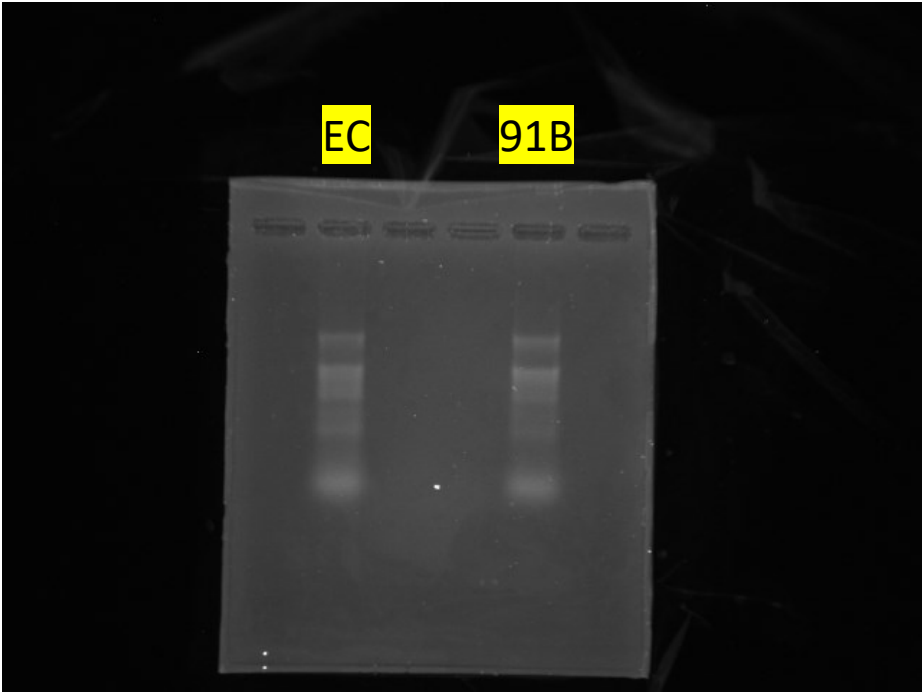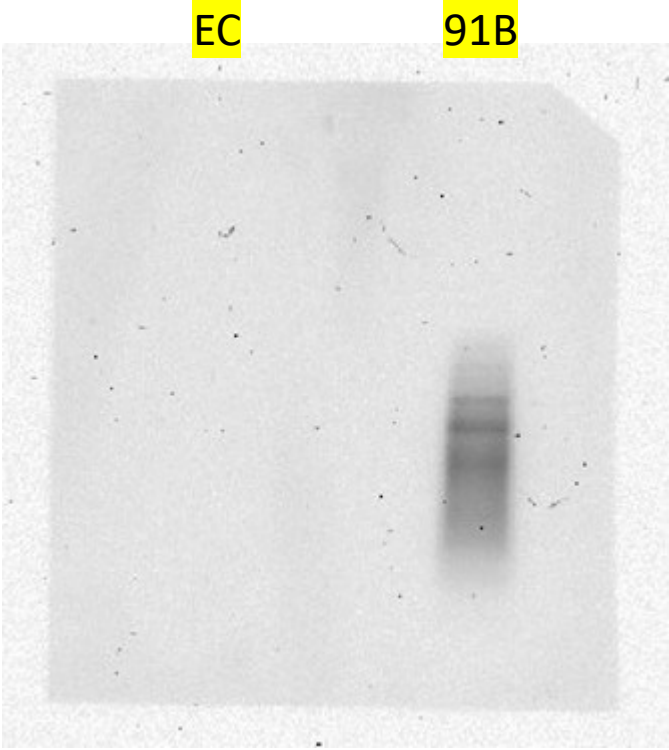

**Detection of transcripts derived from transgene by Northern hybridization**

**Fig. 1B gel and blot images**

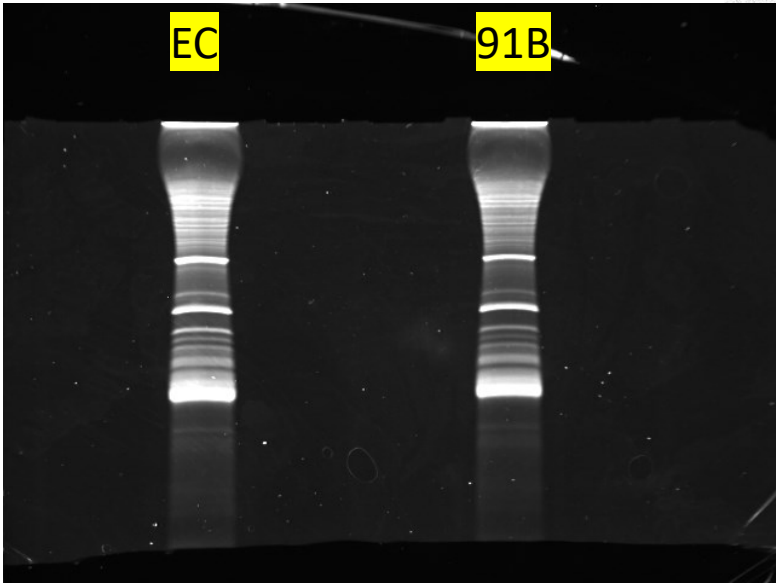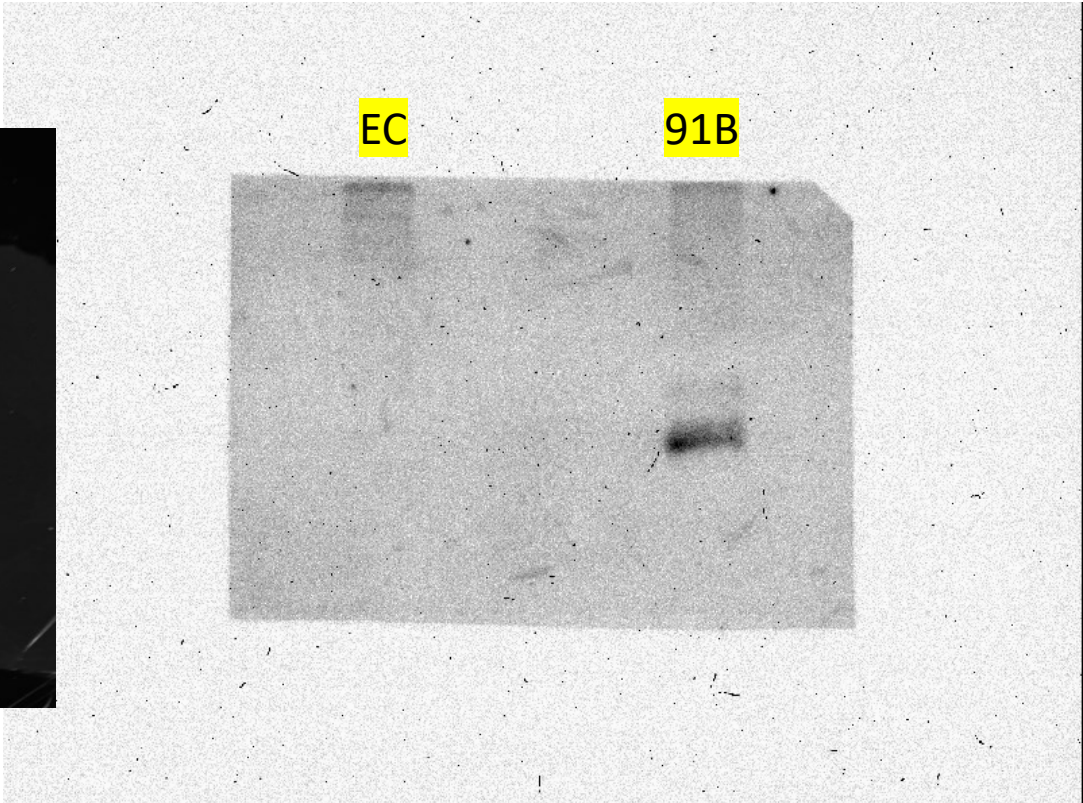

**Detection of transgene-derived small RNA by Northern hybridization**

**Fig. 4A gel and blot images-1**

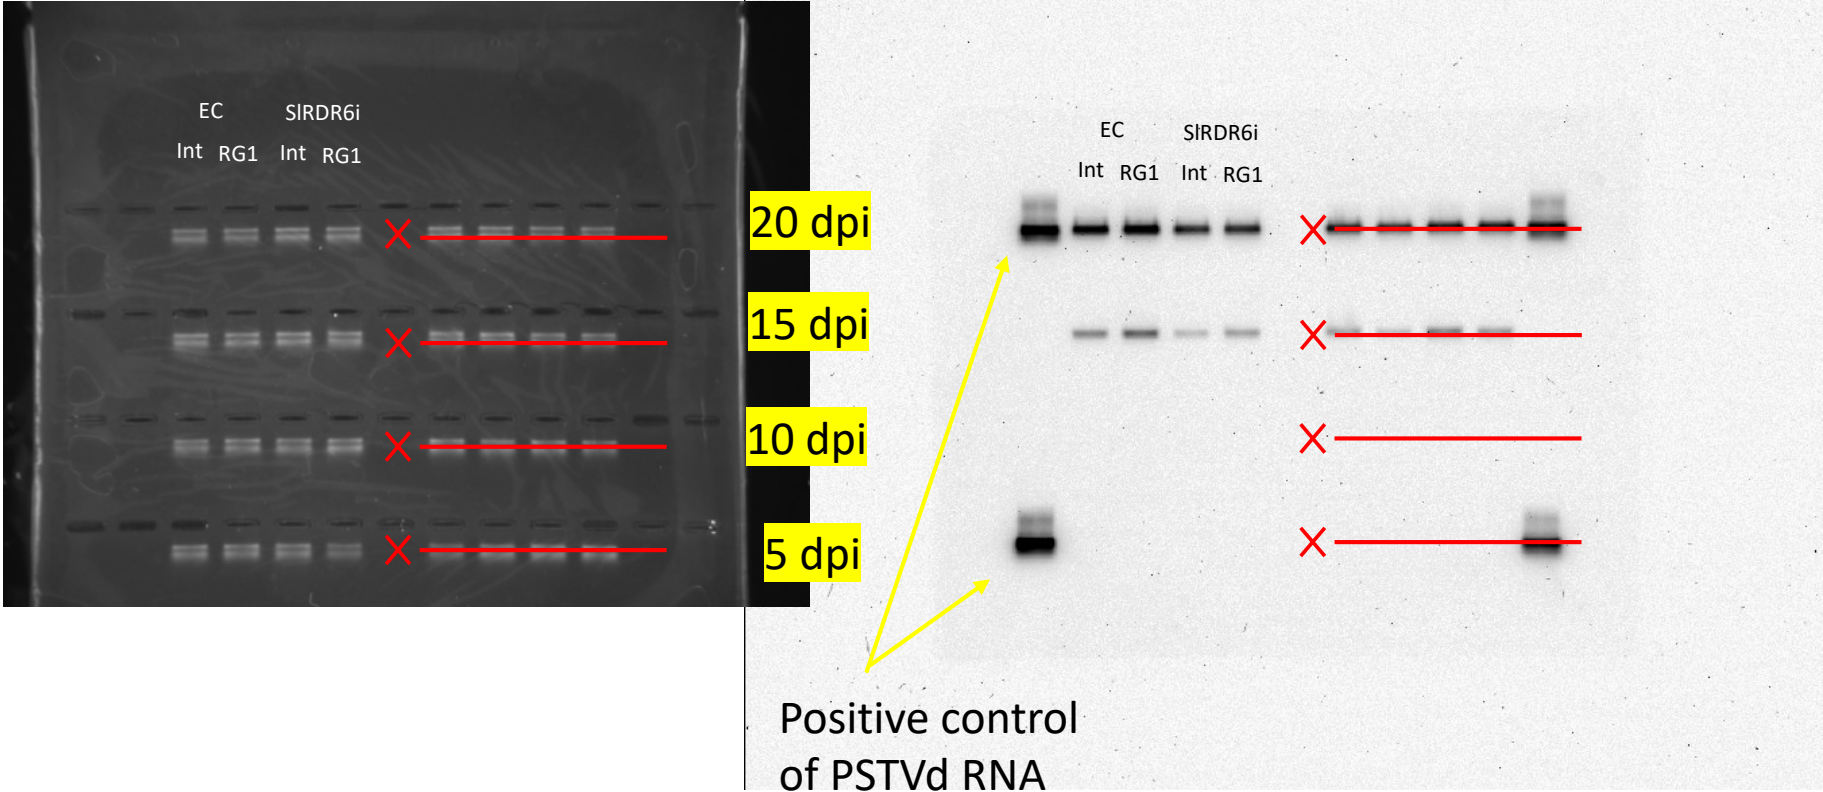

**Detection of PSTVd RNA by Northern hybridization**

**Fig. 4A gel and blot images-2**

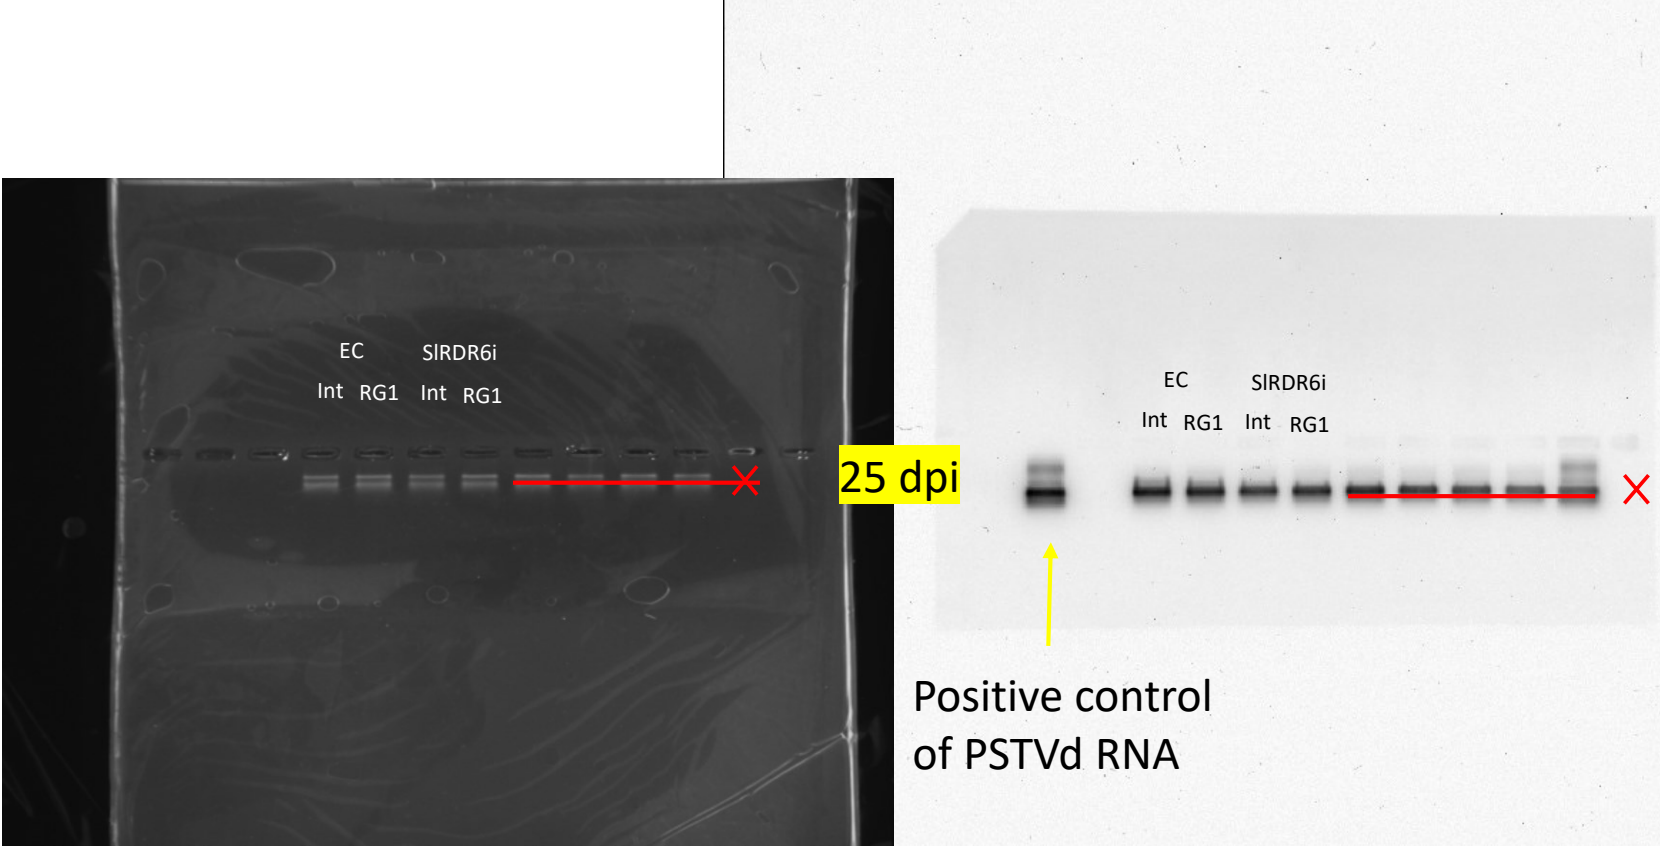

**Detection of PSTVd RNA by Northern hybridization**

**Fig. 6 gel and blot images**

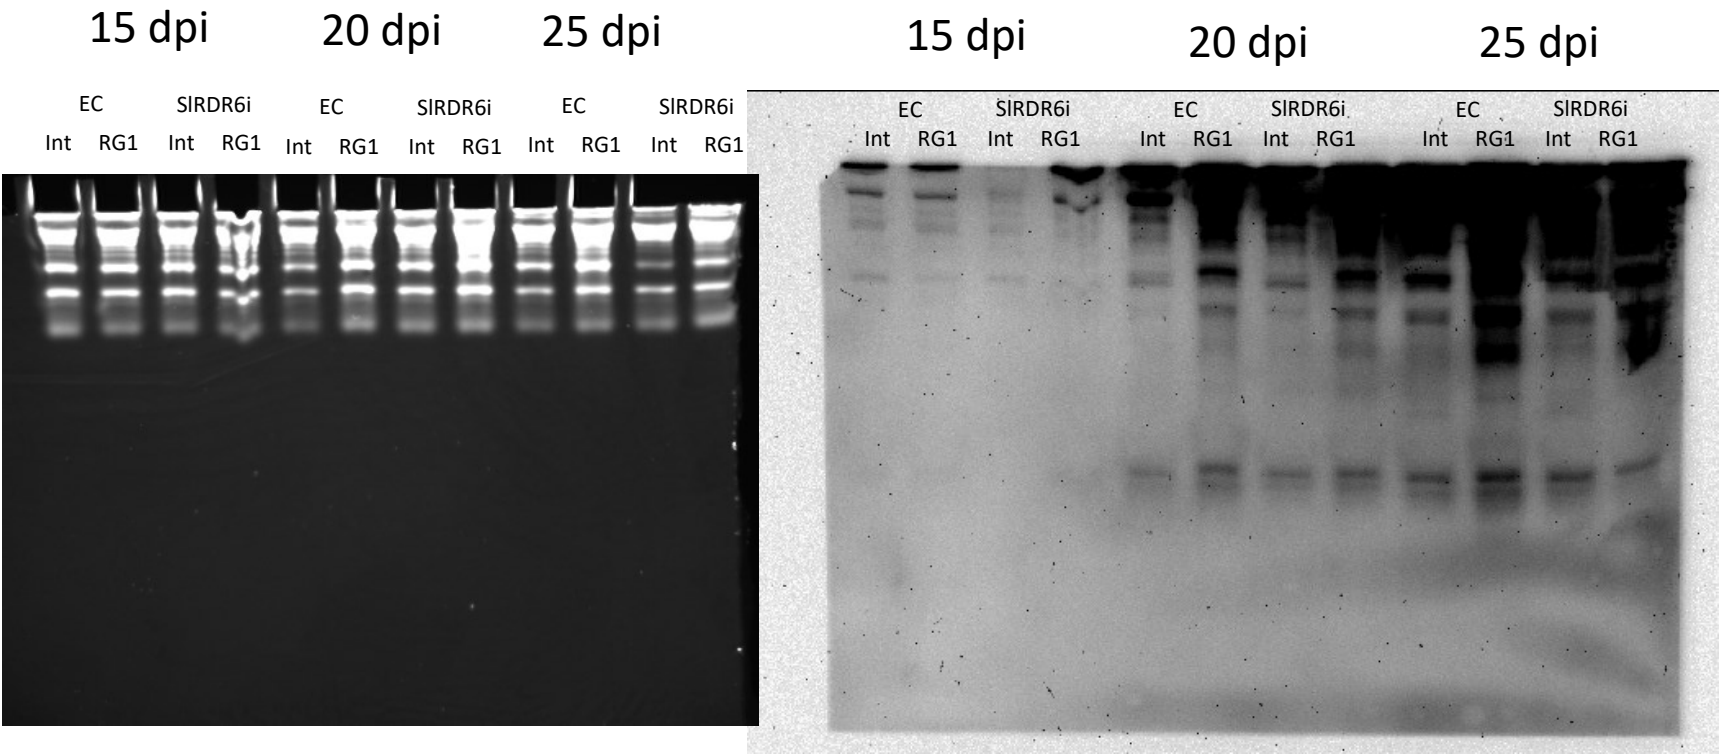

**Detection of PSTVd-derived small RNA by Northern hybridization**



**S4A Fig. gel images**

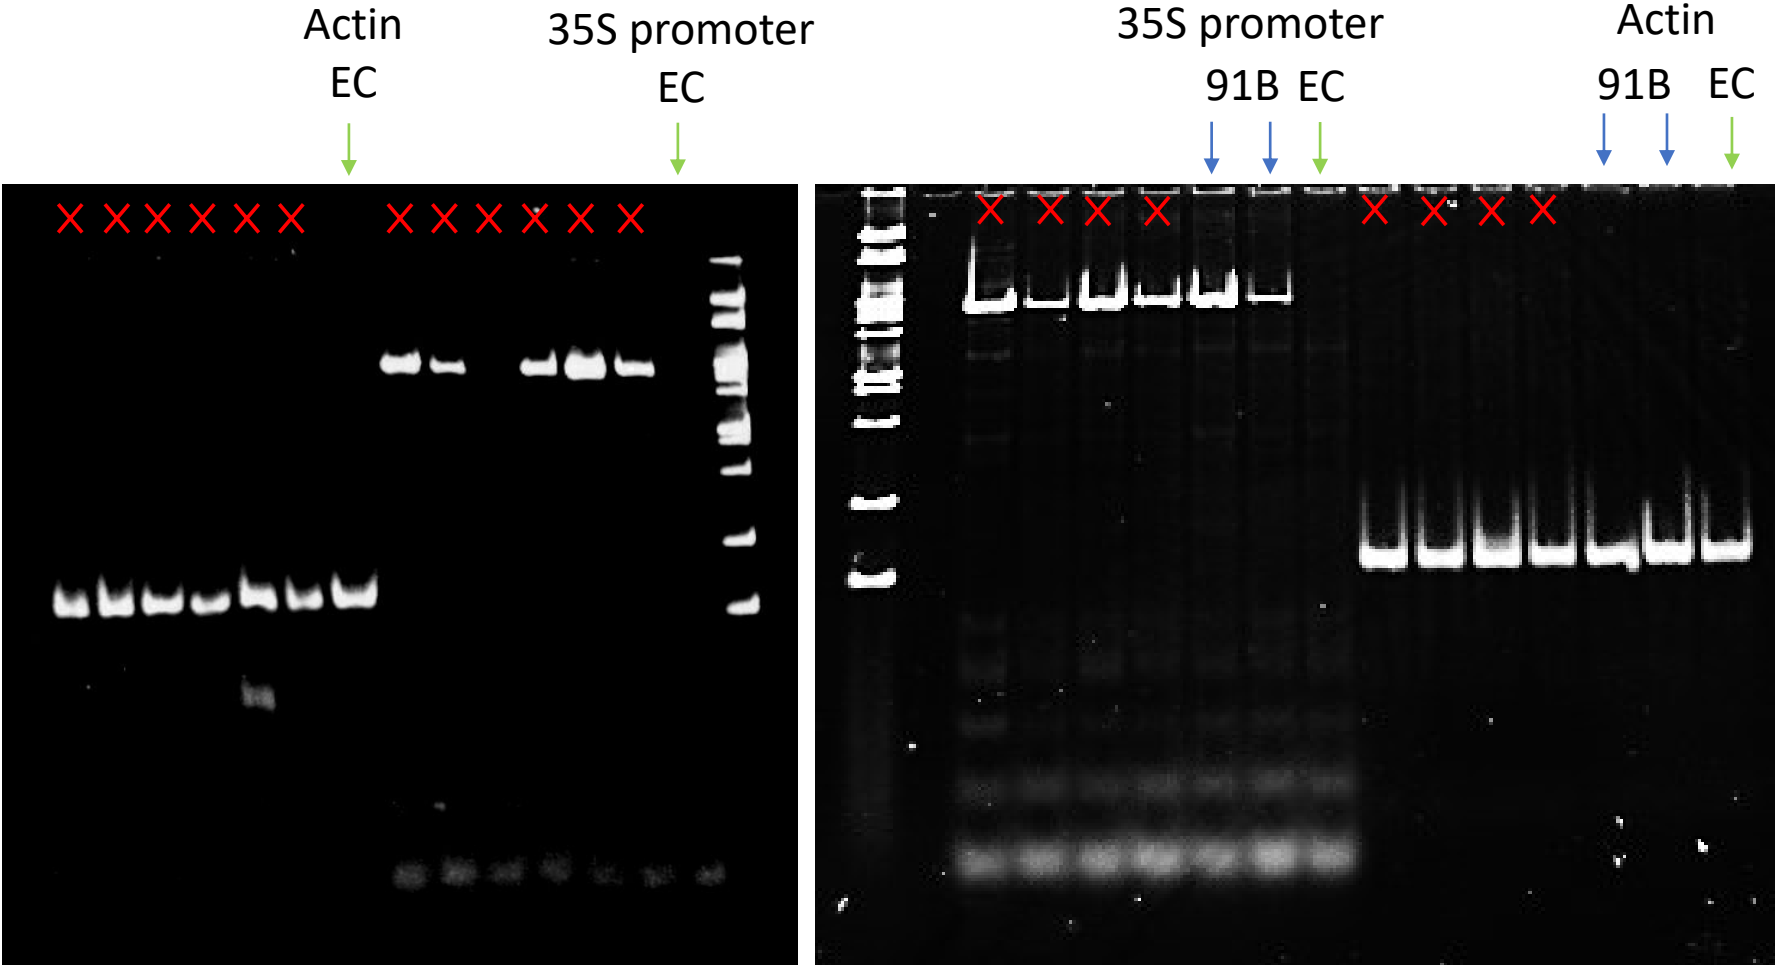

**Amplification and detection of a part of transgene and actin gene by PCR and agarose gel electrophoresis.**

**S4B Fig. blot images-1**

Molecular weight marker **EC**  
EcoR I BamH I X X X X X X

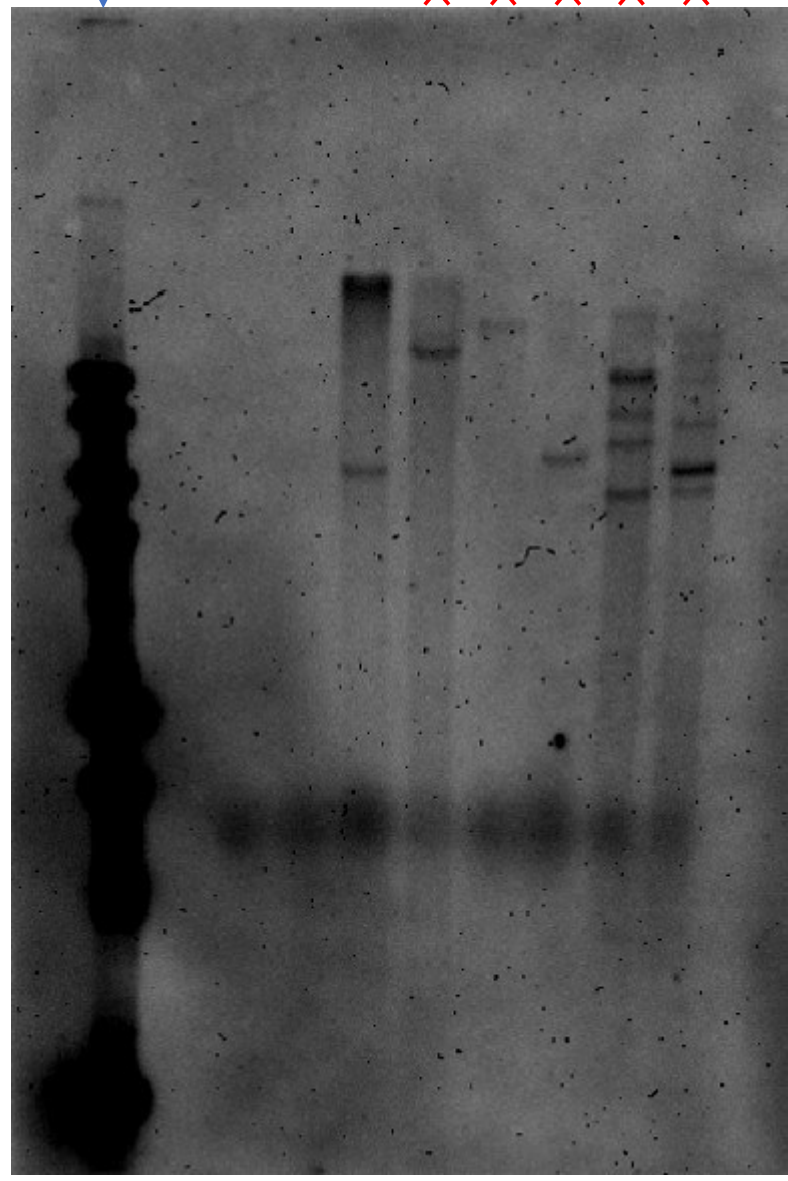

**Confirmation of the copy number of transgene by Southern hybridization**

**S4B Fig. blot images-2**

91B

X X X EcoR I X X X X X X X X X

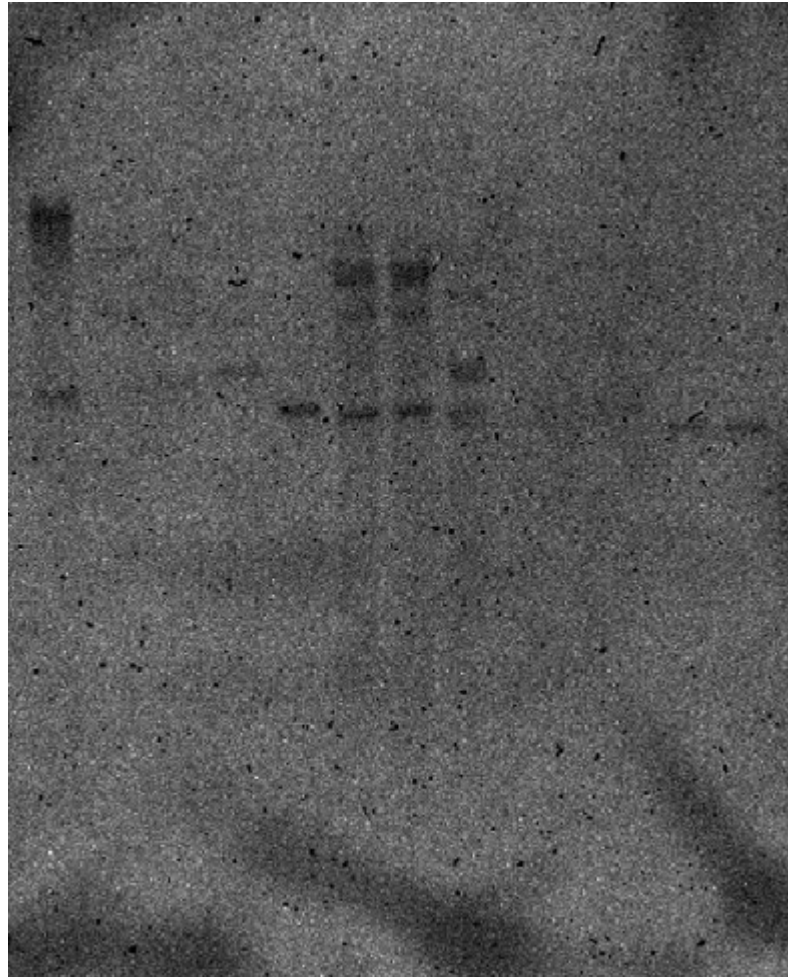

**Confirmation of the copy number of stansgene by Southern hybridization**

The sample in lane 1 are the same sample as lane 3 in blot images-1.



**S4B Fig. blot images-3**

91B

X X X BamH I X X X X X X X X X

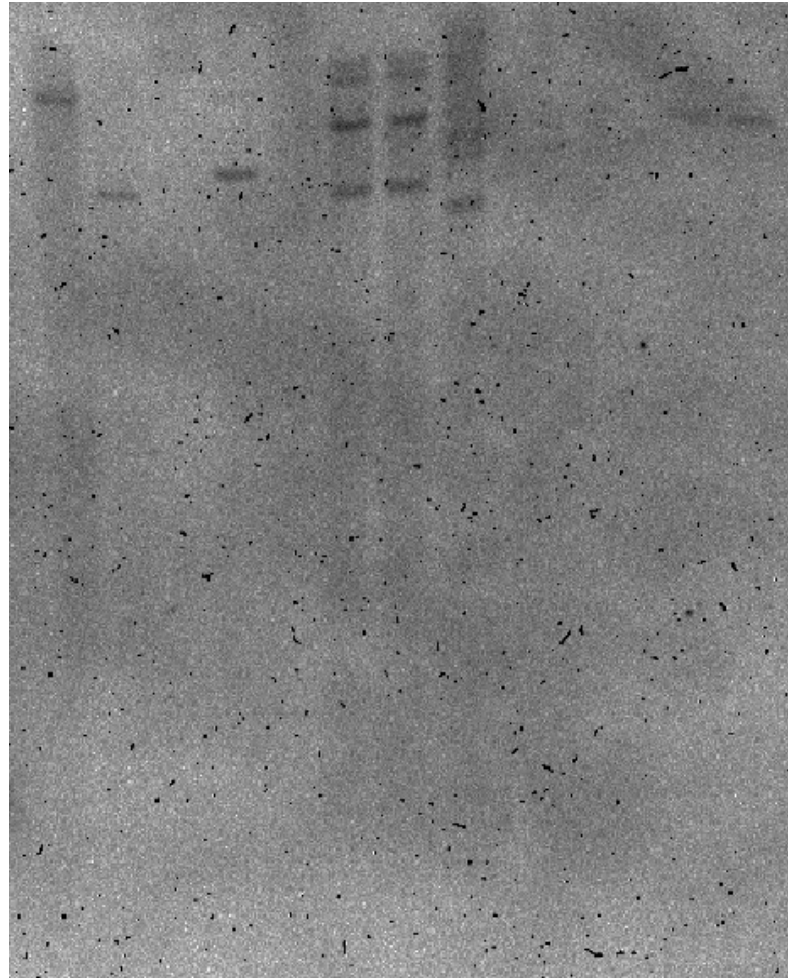

**Confirmation of the copy number of stansgene by Southern hybridization**

The sample in lane 1 are the same sample as lane 4 in blot images-1.

## S7A Fig. gel and blot images

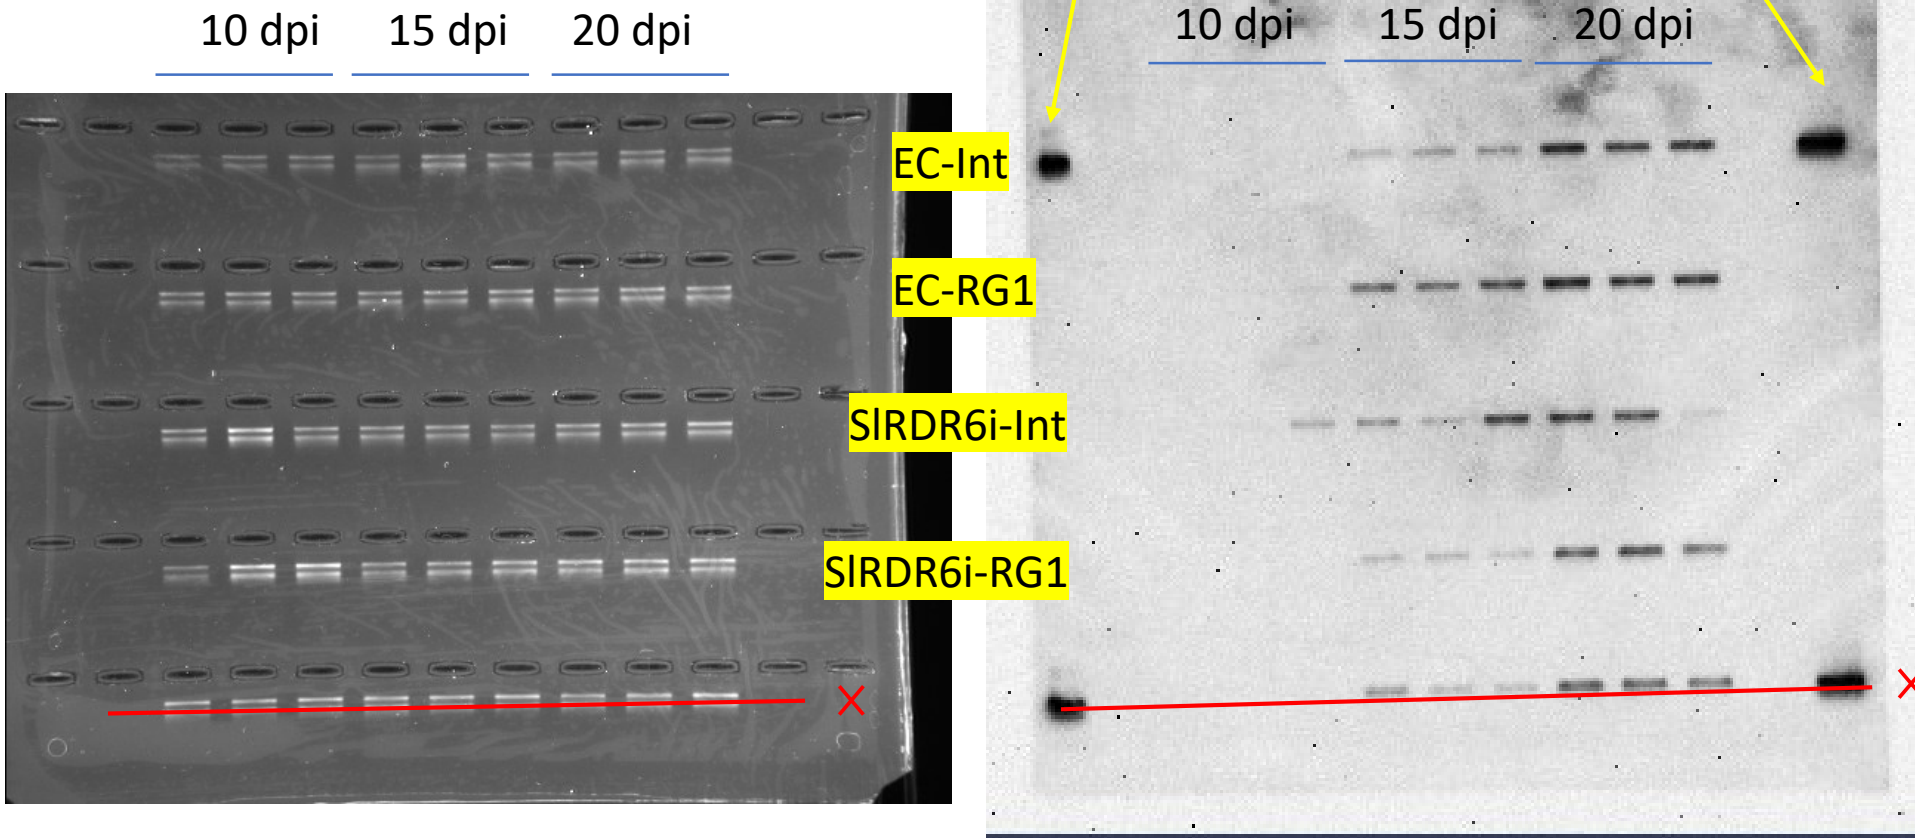

### **Detection of PSTVd RNA by Northern hybridization**

The gel and blot images were taken on separate agarose gel electrophoresis using the same samples.

The lane of the SIRDR6i-Int sample on the blot is shifted to the left by one lane.
